# Supplementary material
Source: PubMed Central journal article supplement (PMC7495884)
Supplement: NIHMS1626492-supplement-1.pdf [file NIHMS1626492-supplement-1.pdf]

## Supplementary Materials for:

Acrophiarin (antibiotic S31794/F-1) from *Penicillium arenicola* shares biosynthetic features with both *Aspergillus*- and *Leotiomyce*-type echinocandins

Nan Lan<sup>1</sup>, Bruno Perlatti<sup>1</sup>, Daniel J. Kvitsek<sup>2</sup>, Philipp Wiemann<sup>2</sup>, Colin J.B. Harvey<sup>2</sup>, Jens Frisvad<sup>3</sup>, Zhiqiang An<sup>1</sup>, Gerald F. Bills<sup>1^</sup>

<sup>1</sup>Texas Therapeutics Institute, The Brown Foundation Institute of Molecular Medicine, The University of Texas Health Science Center at Houston, Houston, Texas 77054, USA

<sup>2</sup>Hexagon Bio, Menlo Park, California 94025, USA

<sup>3</sup>Center for Microbial Biotechnology, Department of Systems Biology, Technical University of Denmark, DK-2800, Lyngby, Denmark

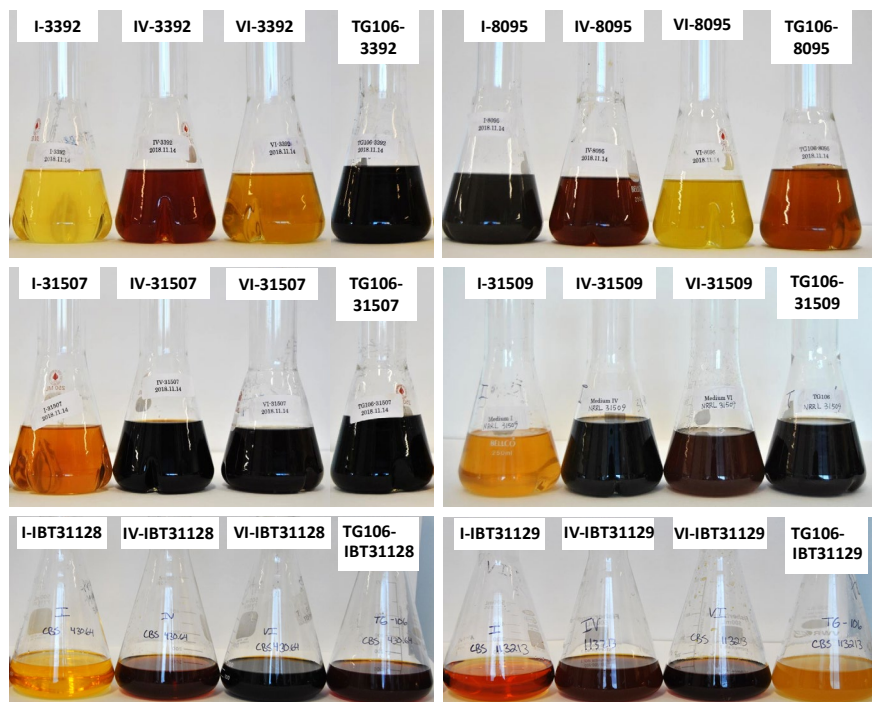

Fig. S1. Methanol extractions showing variation in pigmentation from four acrophiarin-producing strains of *P. arenicola*.

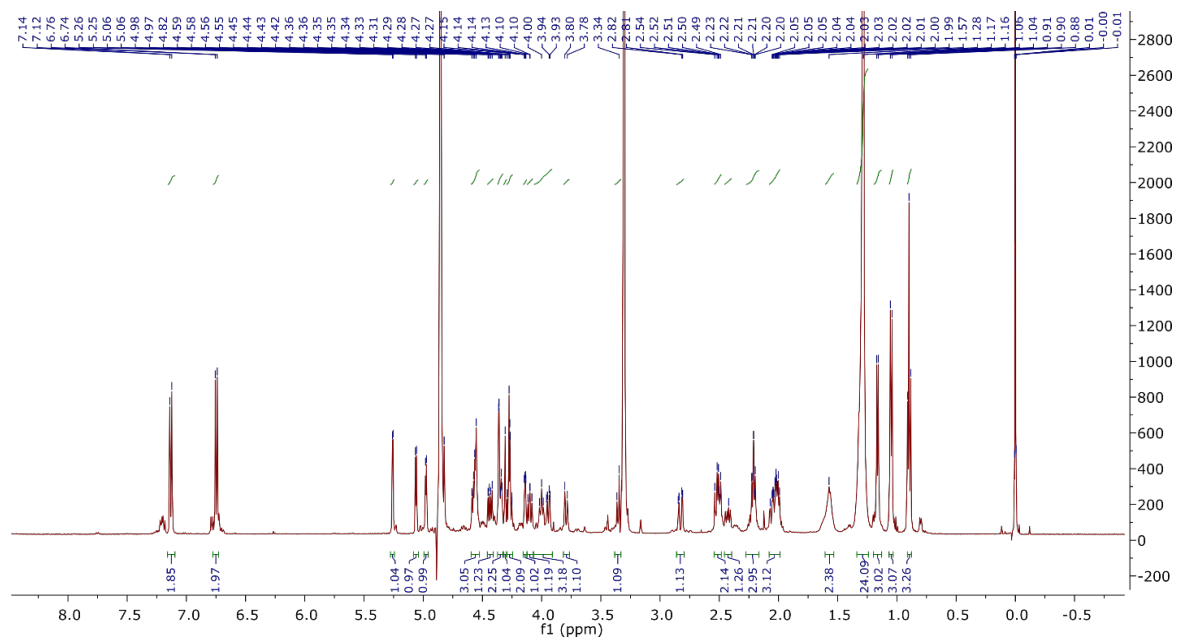

Fig. S2. <sup>1</sup>H NMR of acrophiarin obtained from *P. arenicola* NRRL 8095.

Table S1. The list of *P. arenicola* (NRRL 8095) acrophiarin BCG and surrounding genes.

(No PKS gene were detected).

| Contig 7                |                                                         |
|-------------------------|---------------------------------------------------------|
| Gene                    | Products                                                |
| g2.t1                   | hypothetical protein                                    |
| g3.t1                   | hypothetical protein                                    |
| g4.t1                   | Phosphipase C                                           |
| g5.t1                   | putative P450                                           |
| g6.t1                   | FAD dependent oxidoreductase                            |
| g7.t1                   | transporter                                             |
| g8.t1                   | putative 2-hydroxyacid dehydrogenase                    |
| g9.t1                   | aspartate racemase protein                              |
| g10.t1                  | class II aldolase and adducin domain-containing protein |
| g11.t1                  | hypothetical protein                                    |
| g12.t1                  | fungal specific transcription factor                    |
| g13.t1                  | hypothetical protein                                    |
| g14.t1                  | hypothetical protein                                    |
| <b>g15.t1 to g27.t1</b> | <b>acrophiarin gene cluster</b>                         |
| g28.t1                  | hypothetical protein                                    |
| g29.t1                  | C6 finger domain-containing protein                     |
| g30.t1                  | alpha/beta-hydrolase                                    |
| g31.t1                  | putative glyoxalase family protein                      |
| g32.t1                  | fumarylacetoacetate hydrolase protein                   |
| g33.t1                  | related to MFS drug efflux pump                         |
| g34.t1                  | Clavaminatase synthase-like protein                     |
| g35.t1                  | MFS general substrate transporter                       |
| g36.t1                  | Zn(II)2Cys6 transcription factor                        |
| g37.t1                  | hypothetical protein                                    |
| g38.t1                  | glycosyltransferase family 71 protein                   |
| g39.t1                  | carbohydrate-binding protein                            |

BLAST Results

[Questions/comments](#)

Blast 2 sequences

Job title: GLPKS4

RID [B24SZ2KG114](#) (Expires on 04-14 06:37 am)

Query ID |cl|Query\_92081  
 Description GLPKS4  
 Molecule type amino acid  
 Query Length 2531

Subject ID 91 subjects  
 Description [See details](#)  
 Molecule type amino acid  
 Subject Length 52726  
 Program BLASTP 2.9.0+

Analyze your query with [SmartBLAST](#)

[Graphic Summary](#)

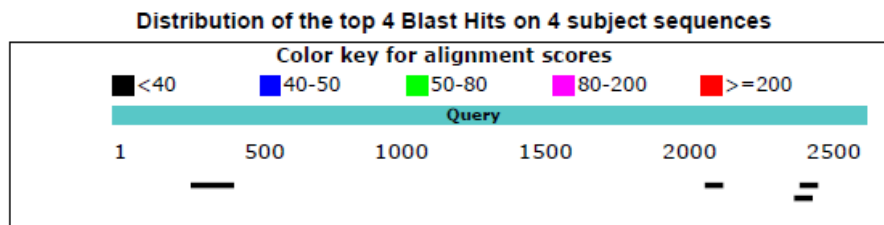

[Descriptions](#)

Sequences producing significant alignments:

| Description    | Max Score | Total Score | Query Cover | E value | Per. Ident | Accession   |
|----------------|-----------|-------------|-------------|---------|------------|-------------|
| contig7:g7.t2  | 26.2      | 26.2        | 2%          | 1.4     | 34.48%     | Query_92092 |
| contig7:g7.t1  | 26.2      | 26.2        | 2%          | 1.5     | 34.48%     | Query_92091 |
| contig7:g21.t1 | 25.8      | 25.8        | 2%          | 2.3     | 28.79%     | Query_92109 |
| contig7:g48.t1 | 23.9      | 23.9        | 5%          | 7.2     | 24.00%     | Query_92143 |

## Alignments

contig7:g7.t2

Sequence ID: Query\_92092 Length: 541 Number of Matches: 1

Range 1: 44 to 97

| Score         | Expect | Method                       | Identities | Positives  | Gaps     | Frame |
|---------------|--------|------------------------------|------------|------------|----------|-------|
| 26.2 bits(56) | 1.4()  | Compositional matrix adjust. | 20/58(34%) | 29/58(50%) | 4/58(6%) |       |

Features:

|       |      |                                                           |      |
|-------|------|-----------------------------------------------------------|------|
| Query | 2344 | LNWAVAKSAVKPSLPGQNQLLIGVRSKSLSDPSNRVSKRDARMGAYLNTGSSTSAN  | 2401 |
|       |      | + W S+V PSLPG Q+ G+ S+ + + SN VS +GA + G S N              |      |
| Sbjct | 44   | ITWDQGSSSVPSLPG-FQMKFGITSAANPTQISNFVSL---VYIGAGIGGGLSFFIN | 97   |

contig7:g7.t1

Sequence ID: Query\_92091 Length: 542 Number of Matches: 1

Range 1: 44 to 97

| Score         | Expect | Method                       | Identities | Positives  | Gaps     | Frame |
|---------------|--------|------------------------------|------------|------------|----------|-------|
| 26.2 bits(56) | 1.5()  | Compositional matrix adjust. | 20/58(34%) | 29/58(50%) | 4/58(6%) |       |

Features:

|       |      |                                                           |      |
|-------|------|-----------------------------------------------------------|------|
| Query | 2344 | LNWAVAKSAVKPSLPGQNQLLIGVRSKSLSDPSNRVSKRDARMGAYLNTGSSTSAN  | 2401 |
|       |      | + W S+V PSLPG Q+ G+ S+ + + SN VS +GA + G S N              |      |
| Sbjct | 44   | ITWDQGSSSVPSLPG-FQMKFGITSAANPTQISNFVSL---VYIGAGIGGGLSFFIN | 97   |

contig7:g21.t1

Sequence ID: Query\_92109 Length: 7573 Number of Matches: 1

Range 1: 6426 to 6491

| Score         | Expect | Method                       | Identities | Positives  | Gaps       | Frame |
|---------------|--------|------------------------------|------------|------------|------------|-------|
| 25.8 bits(55) | 2.3()  | Compositional matrix adjust. | 19/66(29%) | 30/66(45%) | 10/66(15%) |       |

Features:

|       |      |                                                             |      |
|-------|------|-------------------------------------------------------------|------|
| Query | 2024 | EYGSMEIGKRDF-----IGKAQLNMDLFESNRSFFGVDLAKFDAARCQLLLVQM      | 2073 |
|       |      | E GS++ +G+RD IG+ + + S V+L K A Q+ LV                        |      |
| Sbjct | 6426 | EDGSLIHLGRRDTQIKIRGQRVEIGEIEYQITQHLPEASTVAVELLKQGAQQQVSLVAA | 6485 |
| Query | 2074 | MEFYEK 2079                                                 |      |
|       |      | +EF E+                                                      |      |
| Sbjct | 6486 | IEFIEE 6491                                                 |      |

contig7:g48.t1

Sequence ID: Query\_92143 Length: 507 Number of Matches: 1

Range 1: 155 to 299

| Score         | Expect | Method                       | Identities  | Positives   | Gaps        | Frame |
|---------------|--------|------------------------------|-------------|-------------|-------------|-------|
| 23.9 bits(50) | 7.2()  | Compositional matrix adjust. | 36/150(24%) | 51/150(34%) | 18/150(12%) |       |

Features:

|       |     |                                                               |     |
|-------|-----|---------------------------------------------------------------|-----|
| Query | 267 | RDGNIRSVIRATASNCDGKTPGITLPSSSESHEAMMRRAYKEA---CLDPTQTAFV----  | 319 |
|       |     | R D I ++ ATA N G G + S A + CL T A+                            |     |
| Sbjct | 155 | RKKDMIFAIFGATAPN--GAVIGAVFAALFSQLAWWPWFVWMAIICLLTTALAYFVIPR   | 212 |
| Query | 320 | --EAHGTGTKIGDPLEATAIARVFSSEKGVYIGSVK----PNVGHSEGASGVTSIMKAVL  | 373 |
|       |     | G I +E I F G+ + +V P VG V I+ A+                               |     |
| Sbjct | 213 | IHHERKHGLTISGWIEELDIVGAF LGIVGLVLVNVAVNQAPIVGWQMPYVYVLLIVGALF | 272 |
| Query | 374 | ALENRTIPPNINFSTPNPQIPFEASNMKVA                                | 403 |
|       |     | + + P P IPF A N+ V+                                           |     |
| Sbjct | 273 | LVAFFWELQV---APKPLIPFHAFNLDVS                                 | 299 |

ST is a registered trademark of the National Library of Medicine

Fig. S3. NCBI blast results with GLPKS4 protein sequence as query and all the predicted proteins within contig 7. No significant matches found.

Table S2. Genomes used for phylogenetic reference reconstructions.

| Species                                      | strain            | NCBI Taxonomy                       | Genome Center |
|----------------------------------------------|-------------------|-------------------------------------|---------------|
| <i>Glarea lozoyensis</i>                     | ATCC 20868        | Leotiomycetes: Helotiales           | PRJNA72229    |
| <i>Pezizula radicola</i>                     | NRRL 12192        | Leotiomycetes; Helotiales           | PRJNA412280   |
| <i>Aspergillus mulundensis</i>               | DSM 5745          | Eurotiomycetes; Aspergillaceae      | PRJNA389331   |
| <i>Aspergillus japonicus</i>                 | CBS 114.51        | Eurotiomycetes; Aspergillaceae      | PRJNA235073   |
| <i>Aspergillus aculeatus</i>                 | ATCC 16872        | Eurotiomycetes; Aspergillaceae      | PRJNA82765    |
| <i>Aspergillus versicolor</i>                | CBS 583.65        | Eurotiomycetes; Aspergillaceae      | PRJNA207687   |
| <i>Aspergillus sydowii</i>                   | CBS 593.65        | Eurotiomycetes; Aspergillaceae      | PRJNA207689   |
| <i>Aspergillus nidulans</i>                  | FGSC A4           | Eurotiomycetes: Aspergillaceae      | PRJNA13961    |
| <i>Aspergillus flavus</i>                    | NRRL 3357         | Eurotiomycetes: Aspergillaceae      | PRJNA38227    |
| <i>Aspergillus niger</i>                     | ATCC 1015         | Eurotiomycetes: Aspergillaceae      | PRJNA15785    |
| <i>Aspergillus oryzae</i>                    | RIB40             | Eurotiomycetes: Aspergillaceae      | PRJNA28175    |
| <i>Aspergillus terreus</i>                   | NIH 2624          | Eurotiomycetes: Aspergillaceae      | PRJNA17637    |
| <i>Coleophoma crateriformis</i>              | BP5796            | Leotiomycetes; Helotiales           | PRJNA388491   |
| <i>Coleophoma cylindrospora</i>              | BP6252            | Leotiomycetes; Helotiales           | PRJNA389322   |
| <i>Penicillium chrysogenum</i>               | Wisconsin 54-1255 | Eurotiomycetes: Aspergillaceae      | PRJNA39879    |
| <i>Talaromyces marneffeii</i>                | ATCC 18224        | Eurotiomycetes: Trichocomaceae      | PRJNA32665    |
| <i>Talaromyces stipitatus</i>                | ATCC 10500        | Eurotiomycetes: Trichocomaceae      | PRJNA38857    |
| <i>Arthrobotrys oligospora</i>               | ATCC 24927        | Orbiliomycetes: Orbiliaceae         | PRJNA41495    |
| <i>Chaetomium globosum</i>                   | CBS 148.51        | Sordariomycetes: Chaetomiaceae      | PRJNA12795    |
| <i>Cordyceps militaris</i>                   | CM01              | Sordariomycetes: Cordycipitaceae    | PRJNA225510   |
| <i>Fusarium oxysporum f. sp. lycopersici</i> | 4287              | Sordariomycetes: Nectriaceae        | PRJNA18813    |
| <i>Fusarium verticillioides</i>              | 7600              | Sordariomycetes: Nectriaceae        | PRJNA15553    |
| <i>Neurospora crassa</i>                     | OR74A             | Sordariomycetes: Sordariaceae       | PRJNA13841    |
| <i>Saccharomyces cerevisiae</i>              | S288c             | Saccharomycetes: Saccharomycetaceae | PRJNA245761   |

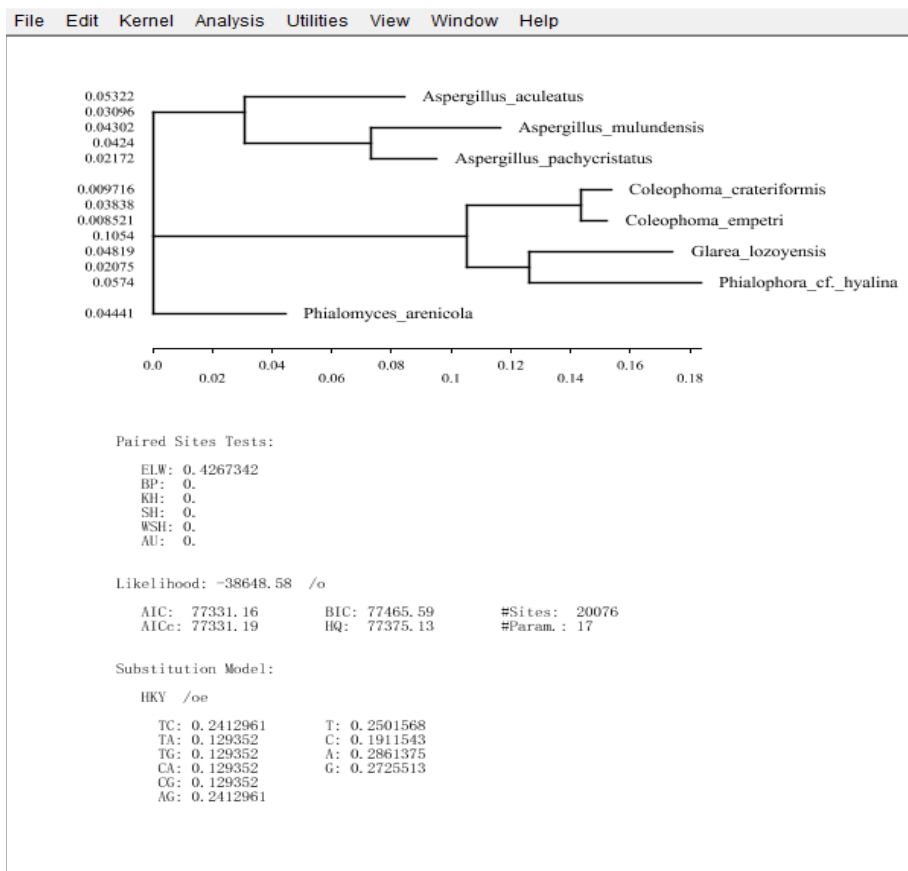

Fig. S4. Hypothesis testing of trees from a ten-set echinocandin pathway genes versus the current classification of the *Ascomycota* implement in TREEFINDER and subject to the Shimodaira-Hasegawa (SH) test and weighted Shimodaira-Hasegawa (WSH) test (Shimodaira H, 1999 Mol Biol Evol).

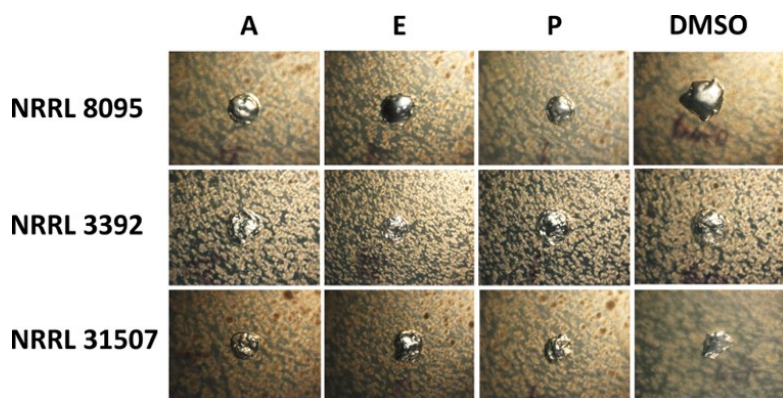

Fig. S5. Magnified view of inhibition zone of *P. arenicola* under stereomicroscope (NRRL 8095, NRRL 31507 and NRRL 3392) against echinocandins. A. Acrophiarin (250 ug/ml). E. Echinocandin B (250 ug/ml). P. Pneumocandin B<sub>0</sub> (250 ug/ml). Assay wells are 4 mm in diam.
